# Supplementary material
Source: publisher site journal article supplement (https://www.spandidos-publications.com/6038/downloadSupplementary)
Supplement: Supplementary file 1 [file downloadSupplementary]

## Sheet: Table SIII
Table SIII. Differentially expressed genes between the high- and the low-CYTH4 group.
Symbol	Log2 Fold Change	Adjusted P-value	Regulation (high vs. low)
S100A9	3.7072	4.03e-10	Up
MPEG1	3.59371	1.41e-13	Up
S100A8	3.49585	6.93e-10	Up
S100A12	3.16254	3.44e-09	Up
CD14	2.82083	1.47e-08	Up
FGR	2.78333	8.85e-15	Up
VCAN	2.61001	1.83e-06	Up
MS4A6A	2.57639	6.25e-10	Up
LILRB2	2.5097	1.29e-12	Up
CD300E	2.46825	5.55e-08	Up
KCTD12	2.45769	2.11e-10	Up
HK3	2.4358	1.35e-08	Up
IRF8	2.42601	9.45e-12	Up
CYTH4	2.4058	3.18e-32	Up
RNU6ATAC6P	2.40476	2.66e-06	Up
IGHD4-4	2.37303	3.61e-05	Up
FGL2	2.356	6.5e-10	Up
TNFRSF1B	2.32009	9.26e-14	Up
PLBD1	2.27488	1.72e-07	Up
LSP1	2.23357	7.91e-14	Up
RNASE6	2.22353	2.98e-08	Up
LGALS2	2.22345	2.64e-08	Up
CLEC7A	2.21054	6.97e-10	Up
HLA-DRA	2.20057	4.57e-10	Up
AC016735.1	2.1975	0.00159	Up
ITGAX	2.19737	2.84e-15	Up
CX3CR1	2.18346	4.19e-08	Up
LST1	2.16631	8.02e-18	Up
FCN1	2.15591	9.78e-06	Up
IGHD4-11	2.15176	0.000111	Up
IGHD1-1	2.14959	3.25e-05	Up
IGHD5-5	2.14904	0.000158	Up
JAML	2.14679	1.06e-11	Up
LRRC25	2.14024	6.51e-10	Up
LYZ	2.13599	0.000145	Up
NCF2	2.13358	1.05e-10	Up
LILRA1	2.12732	1.37e-12	Up
IGHD5-12	2.12588	0.000146	Up
C5AR1	2.12577	7.08e-07	Up
ITGB2	2.12045	4.99e-17	Up
LILRA5	2.11456	3.64e-08	Up
TNFAIP2	2.11296	1.29e-12	Up
TLR8	2.10517	3.55e-08	Up
SPINK2	2.10245	0.00012	Up
MAFB	2.0968	3.89e-07	Up
NAPSB	2.0819	2.1e-09	Up
LRP1	2.07251	8.26e-08	Up
LILRB4	2.06914	4.7e-10	Up
IGHD3-16	2.06733	0.000167	Up
CD1D	2.05541	6.56e-09	Up
CD300A	2.05459	2.06e-24	Up
SAMHD1	2.03909	5.5e-09	Up
LY86	2.03713	3.41e-07	Up
HLA-DRB1	2.03551	4.49e-09	Up
CD300LB	2.02638	6.35e-12	Up
MIR6774	2.02249	1.06e-09	Up
VNN1	2.00059	7.17e-07	Up
CD86	1.99839	2.51e-10	Up
IGHD1-14	1.98924	0.000218	Up
IGHD2-8	1.98405	9.68e-05	Up
IGHD6-19	1.98128	0.000512	Up
IGHD3-3	1.97921	0.000332	Up
IGHD6-6	1.97761	0.000849	Up
FAM30A	1.97598	6.05e-06	Up
IGHD5-24	1.94446	0.000244	Up
CD300C	1.9311	1.59e-10	Up
CYBB	1.92645	1.89e-05	Up
HLA-DPA1	1.91564	1.26e-07	Up
HLA-DRB6	1.91064	1.62e-07	Up
IGHD1-20	1.90939	0.000716	Up
IGHD3-9	1.90771	5.13e-05	Up
CCR2	1.90614	7.21e-07	Up
IGHD3-10	1.90596	0.000202	Up
HOXA9	1.90462	0.000137	Up
FGD2	1.90332	1.16e-11	Up
ITGAM	1.90043	9.98e-10	Up
NCF1	1.8993	1.34e-09	Up
NCF1C	1.899	1.24e-09	Up
VSIR	1.89386	8.29e-14	Up
PLD4	1.89314	5.04e-11	Up
IGHD5-18	1.88976	0.00109	Up
ITGB2-AS1	1.88935	4.13e-12	Up
CD74	1.88266	1.11e-09	Up
IGHD2-2	1.88135	4.25e-05	Up
PROM1	1.87951	0.000255	Up
CTSS	1.86898	1.45e-11	Up
SIRPB1	1.86576	4.75e-08	Up
ALOX5AP	1.8644	1.62e-08	Up
FPR1	1.86355	4.44e-06	Up
HLA-DRB5	1.85545	4.11e-06	Up
IGHD2-15	1.82752	0.00027	Up
LILRB3	1.82493	1.16e-11	Up
RBM47	1.81832	8.71e-09	Up
VNN2	1.80642	9.5e-08	Up
CDA	1.79965	1.02e-05	Up
IGHD1-7	1.79475	0.00113	Up
CD163	1.79308	0.00014	Up
IGHD4-17	1.78195	0.00225	Up
HLA-DPB1	1.77804	3.9e-07	Up
IGHD6-13	1.77393	0.00167	Up
LAT2	1.76822	5.92e-18	Up
IGHJ2P	1.76669	0.000213	Up
NLRP12	1.76636	2.07e-09	Up
AC246787.2	1.74467	0.000121	Up
SMIM25	1.7352	4.01e-07	Up
MIR4802	1.73228	2.57e-07	Up
ITGAL	1.72453	4.84e-17	Up
SLC7A7	1.72075	1.22e-07	Up
CCR1	1.71266	8.58e-07	Up
KLF4	1.71039	8.36e-06	Up
HOXA5	1.70593	0.00166	Up
IL1RN	1.70471	1.06e-09	Up
RGS2	1.6842	6.73e-06	Up
SLC11A1	1.68351	5.25e-06	Up
SIGLEC9	1.68324	5.11e-07	Up
SECTM1	1.67661	2.09e-08	Up
PECAM1	1.67306	5.98e-14	Up
LGALS1	1.66864	2.85e-06	Up
IGHD6-25	1.66488	0.00203	Up
MEFV	1.65294	4.89e-07	Up
SCIMP	1.64977	4.28e-08	Up
CLEC4A	1.64851	8.78e-09	Up
IGHD1-26	1.64386	0.00244	Up
MS4A4E	1.64194	4.14e-05	Up
LILRB1	1.63804	3.84e-09	Up
IGHD2-21	1.63731	0.00129	Up
MS4A4A	1.63583	1.87e-07	Up
P2RY13	1.62548	1.07e-07	Up
NCF1B	1.62033	6.68e-09	Up
LILRA2	1.60564	7.38e-10	Up
CD180	1.60392	1.01e-07	Up
HCK	1.59973	2.79e-08	Up
MIR6503	1.59275	2.66e-05	Up
HLA-DMA	1.59023	4.04e-09	Up
CDC42EP3	1.57748	1.29e-12	Up
ARHGAP4	1.57512	8.55e-13	Up
HLA-DMB	1.56873	9.35e-08	Up
DHRS9	1.56639	5.59e-08	Up
CHST15	1.55702	4.86e-07	Up
LILRA6	1.55154	6.19e-08	Up
AL627309.7	1.53582	7.53e-05	Up
POU2F2	1.52303	1.32e-09	Up
CD300LF	1.51991	1.77e-13	Up
SCPEP1	1.51046	8.41e-06	Up
MIR4298	1.5027	9.2e-09	Up
HSPE1P18	1.4931	5.26e-08	Up
RAB31	1.48727	5.58e-06	Up
ADAP2	1.487	6.39e-08	Up
LFNG	1.48638	3.26e-11	Up
IGHD4-23	1.4827	0.00571	Up
IL10RA	1.48049	8.03e-08	Up
ANXA5	1.48007	0.000108	Up
CD93	1.47766	8.83e-05	Up
SLC15A3	1.47192	3.19e-09	Up
IGHD3-22	1.46912	0.00308	Up
SULF2	1.46357	6.9e-07	Up
STX11	1.46309	2.45e-07	Up
TNNI2	1.4614	1.14e-10	Up
SERPINB6	1.45995	2.8e-09	Up
PTAFR	1.4562	2.88e-05	Up
HLA-DQB1	1.44863	0.000382	Up
AL133371.2	1.44357	2.39e-06	Up
SORT1	1.43939	6.96e-05	Up
TSPAN32	1.43735	1.3e-08	Up
SERPINB2	1.43326	5.14e-05	Up
BCL6	1.43175	3.39e-07	Up
MYOF	1.41861	2.3e-06	Up
METTL7B	1.41738	3.16e-05	Up
AC104232.1	1.41638	0.00197	Up
HOXB3	1.41163	0.00407	Up
TLR7	1.41139	1.88e-07	Up
AP1S2	1.41045	1.06e-11	Up
ARHGEF10L	1.40966	1.02e-08	Up
CIITA	1.40689	6.66e-06	Up
AC008753.2	1.40658	5.25e-08	Up
MEIS1	1.40091	0.000414	Up
BCL2A1	1.3941	4.05e-06	Up
SKAP2	1.39256	2.49e-07	Up
ABI3	1.38076	9.69e-09	Up
CASP1	1.37622	1.06e-11	Up
IGSF6	1.3747	4.84e-08	Up
PLCB2	1.37188	5.98e-14	Up
PLXNB2	1.36849	8.85e-15	Up
SLA	1.36437	2.06e-13	Up
TLDC2	1.36313	5.25e-08	Up
FCER1G	1.3622	0.000327	Up
BLNK	1.3555	4.62e-05	Up
AQP9	1.35456	0.000151	Up
MIR4518	1.35357	3.61e-11	Up
RNU7-61P	1.35284	1.61e-08	Up
SELL	1.3496	5.93e-05	Up
LY96	1.3473	1.62e-06	Up
CSF2RA	1.34655	5.67e-09	Up
KIAA0513	1.34571	4.5e-10	Up
RNA5SP498	1.3414	7.51e-05	Up
MN1	1.33493	0.000957	Up
AC133065.3	1.3339	2.19e-07	Up
ATP10A	1.33309	1.16e-06	Up
IGF2R	1.33288	5.51e-07	Up
AC138649.1	1.33167	7.35e-05	Up
HOXA6	1.33113	0.00511	Up
CD1C	1.32908	3.78e-05	Up
VCAN-AS1	1.32745	0.000109	Up
SLC38A1	1.32622	2.62e-05	Up
MEF2C	1.32477	4.31e-08	Up
CXCL16	1.3214	6.21e-07	Up
MCEMP1	1.32128	2.15e-05	Up
MIR4439	1.31975	4.04e-07	Up
AC138207.5	1.31822	1.25e-06	Up
AHR	1.31718	1.4e-05	Up
AC008753.3	1.31602	8.28e-08	Up
CSF1R	1.3125	1.85e-05	Up
MIR373	1.30907	1.8e-06	Up
GPR132	1.30892	2.79e-15	Up
RN7SL138P	1.30864	3.55e-06	Up
ACY3	1.307	0.00109	Up
CD36	1.30581	0.00177	Up
C19orf38	1.3048	3.33e-06	Up
MIR7848	1.30271	1.08e-09	Up
HMOX1	1.30218	0.000172	Up
SLC43A2	1.30036	6.68e-09	Up
LRRK2	1.2995	3.19e-06	Up
DPYD	1.2979	5.9e-09	Up
DOK2	1.29782	2.29e-07	Up
RNU6-878P	1.29776	6.9e-07	Up
ADGRE1	1.2957	0.00012	Up
COTL1	1.29433	9.58e-09	Up
TLR6	1.29417	1.67e-12	Up
HTR1F	1.29234	7.29e-05	Up
AREG	1.29086	0.0199	Up
CLEC2B	1.28961	3.78e-07	Up
TRBVB	1.28947	0.0256	Up
SH3TC1	1.28786	1.57e-09	Up
NLRP3	1.28693	4.7e-10	Up
CCDC88B	1.28622	1.25e-11	Up
GLIPR2	1.28521	1.06e-09	Up
CPNE8	1.28481	0.000621	Up
S100A4	1.28217	1.88e-07	Up
NRGN	1.28112	0.000567	Up
OAS2	1.2806	4.03e-07	Up
TRPS1	1.27712	1.58e-06	Up
HOXA10	1.27513	0.00111	Up
RNU6-917P	1.27386	7.26e-08	Up
HOXB-AS2	1.27358	0.0109	Up
AC092868.1	1.27323	1.39e-07	Up
CXORF21	1.27296	7.32e-08	Up
MICAL1	1.27235	6.58e-11	Up
TYROBP	1.26286	1.97e-05	Up
CD52	1.25446	0.00251	Up
SIGLEC7	1.25378	8.15e-07	Up
PPBP	1.2535	0.0256	Up
AC245128.3	1.25282	0.00162	Up
CCL23	1.25253	0.0012	Up
VDR	1.25038	3.95e-09	Up
IGHD7-27	1.24894	0.0151	Up
ITGB7	1.24614	5.9e-09	Up
DTX4	1.24459	7.69e-10	Up
RNA5SP390	1.24376	2.28e-05	Up
FGD4	1.24375	3.13e-07	Up
C11orf21	1.24295	6.46e-08	Up
PAK1	1.24173	2.06e-13	Up
HIP1	1.23985	4.17e-08	Up
AC010082.1	1.23779	1.6e-07	Up
RPL32P1	1.23658	9.65e-05	Up
FCAR	1.2343	0.000993	Up
GPAT3	1.2287	8.65e-06	Up
CTSD	1.226	2.43e-07	Up
PRKCD	1.22409	3.03e-09	Up
TLR5	1.21971	1.28e-06	Up
KCNQ1	1.21831	2.57e-07	Up
AL109914.1	1.21698	3.56e-05	Up
TNS3	1.21621	7.06e-07	Up
SNX10	1.21433	2.18e-07	Up
APOBR	1.20933	2.57e-09	Up
MEGF9	1.20698	9.29e-07	Up
FCGR2C	1.20584	0.000331	Up
DUSP6	1.20361	7.47e-05	Up
SH2D3C	1.19964	2.72e-10	Up
NEK6	1.19945	2.61e-13	Up
FAM49A	1.19883	6.39e-08	Up
GIMAP4	1.19873	0.000709	Up
HOXA3	1.1984	0.00182	Up
FAM198B	1.19496	0.000382	Up
SLC16A3	1.19453	2.16e-11	Up
GIMAP8	1.19289	2.62e-05	Up
AC245884.12	1.19152	0.00381	Up
ADGRG5	1.19034	6.8e-05	Up
IGHJ1P	1.18949	0.0136	Up
CAPG	1.18589	0.000132	Up
AC090559.1	1.18493	1.31e-08	Up
FBP1	1.18438	0.00207	Up
WDR49	1.1814	1.32e-05	Up
OAS1	1.17421	3.64e-07	Up
HLA-DQB1-AS1	1.17347	0.00126	Up
S100A6	1.17318	6.73e-05	Up
CES1	1.17264	0.00877	Up
MTMR11	1.17062	5.75e-05	Up
ASGR2	1.16993	1.53e-05	Up
TLR1	1.16902	1.36e-09	Up
C1orf162	1.168	6e-06	Up
RHBDF2	1.16702	6.58e-11	Up
HDAC9	1.1594	4.45e-09	Up
CD4	1.15918	0.000698	Up
RASGRP4	1.15591	2.13e-06	Up
HOXB2	1.15428	0.0017	Up
AOAH	1.15171	0.000488	Up
PLA2G4A	1.14893	5.96e-07	Up
ADCY7	1.14715	1.2e-08	Up
CD84	1.13947	3.34e-08	Up
AC098869.1	1.13673	3.59e-06	Up
UNC93B1	1.13539	7.34e-09	Up
SIPA1	1.13198	1.11e-15	Up
ANGPT1	1.1297	0.00477	Up
APOBEC3A	1.12707	0.00147	Up
AP001257.1	1.12698	1.62e-06	Up
CCR5	1.12678	2.43e-06	Up
FCGR3A	1.12667	0.00499	Up
SIGLEC10	1.12495	4.53e-07	Up
AC093520.2	1.12322	1.53e-09	Up
SH3BP2	1.12237	7.65e-15	Up
HTATIP2	1.12055	9.66e-11	Up
HSPA7	1.11635	0.000816	Up
AC010880.1	1.1137	0.0349	Up
NLRC4	1.11229	2.7e-06	Up
TFEB	1.1119	8.38e-10	Up
ARHGAP45	1.10828	1.38e-13	Up
TYMP	1.10723	0.000869	Up
AIF1	1.10685	7.17e-08	Up
MVP	1.10001	8.03e-12	Up
IRF5	1.09958	3.26e-11	Up
CLIP4	1.09883	6.17e-08	Up
LINC00482	1.09836	0.000104	Up
ST14	1.09699	7.82e-05	Up
SELPLG	1.0941	7.52e-09	Up
IFI30	1.09224	2.31e-06	Up
HOXB4	1.09189	0.00755	Up
MYO1F	1.09004	2.18e-11	Up
SGMS2	1.08751	1.25e-05	Up
IL12RB1	1.08555	3.97e-10	Up
LAPTM5	1.08512	1.02e-12	Up
SLC37A2	1.08015	3.53e-06	Up
CD101	1.07923	2.39e-05	Up
OR52K3P	1.0777	0.00113	Up
DAPP1	1.0773	1.53e-09	Up
MS4A7	1.07408	0.00242	Up
AC116366.2	1.07269	6.2e-10	Up
RPL7AP64	1.07239	8.46e-06	Up
TCIRG1	1.06955	1.7e-06	Up
ACPP	1.06724	3.55e-06	Up
GPR183	1.06691	1.72e-05	Up
HOXA10-AS	1.06495	0.000514	Up
THEMIS2	1.05773	1.57e-06	Up
LTB4R	1.05059	5.79e-11	Up
SRC	1.0498	8.25e-07	Up
GIMAP7	1.04973	0.00189	Up
PBX3	1.04896	0.00472	Up
CLEC10A	1.04579	0.00342	Up
CARD16	1.04228	1.95e-10	Up
SLC44A1	1.04218	0.000224	Up
AC007556.1	1.04144	2.33e-05	Up
AC116348.2	1.04134	1.77e-13	Up
MIR3690	1.03971	4.33e-05	Up
AC064805.1	1.03945	6.41e-06	Up
SERPINI2	1.0353	6.67e-05	Up
MMRN1	1.03222	0.0112	Up
MARCO	1.02915	0.000756	Up
ZNF385A	1.0272	6.17e-05	Up
IL13RA1	1.02696	0.00179	Up
AC011767.1	1.02689	0.000144	Up
GPBAR1	1.02623	2.8e-05	Up
CEBPB	1.02597	0.000169	Up
AL391832.2	1.02541	3.42e-07	Up
ARAP1	1.0252	1.12e-12	Up
TRBV27	1.02506	0.0237	Up
AC005632.2	1.02464	4.31e-08	Up
FLNB	1.02396	0.0012	Up
MS4A14	1.02393	0.00127	Up
ELF4	1.02316	4.54e-15	Up
CPVL	1.02227	0.0116	Up
VCL	1.02225	4.97e-11	Up
RAB37	1.02183	9.16e-07	Up
DPYSL2	1.02	0.00115	Up
AF064858.1	1.01971	7.77e-05	Up
CUEDC1	1.01527	2.64e-11	Up
SH3BP1	1.01488	2.52e-10	Up
TMC8	1.01355	3.43e-09	Up
SASH3	1.01044	3.19e-13	Up
TNFSF10	1.0069	0.000214	Up
HOXB5	1.00687	0.0101	Up
TGFBI	1.00627	0.00331	Up
HLX	1.00554	6.76e-08	Up
DOCK1	1.00476	0.00585	Up
HOXB-AS1	1.00081	9.74e-05	Up
HOXB6	1.00021	0.0196	Up
LINC01835	-3.80703	8.95e-11	Down
CPA3	-3.01011	2.29e-09	Down
ELANE	-2.93655	3.46e-06	Down
MPO	-2.75551	4.7e-05	Down
CYTL1	-2.43335	4.52e-08	Down
NTNG2	-2.40032	2.74e-11	Down
RF02246	-2.39361	1.85e-13	Down
MEG3	-2.30884	4.84e-08	Down
LPO	-2.146	1.1e-08	Down
PRRT4	-2.1181	1.23e-12	Down
GABRE	-2.06564	1.21e-09	Down
MMP2	-2.04704	1.54e-07	Down
UGT3A2	-1.98839	5.67e-09	Down
CTSLP2	-1.98032	1.28e-09	Down
ACSM3	-1.97384	8.12e-12	Down
ACSM1	-1.94066	3.16e-11	Down
SLC24A3	-1.93967	5.71e-12	Down
SIX3	-1.8793	1.12e-12	Down
RF02247	-1.87629	9.26e-14	Down
CRNDE	-1.87405	1.57e-09	Down
IL17RE	-1.8674	1.35e-07	Down
IGFBP2	-1.80054	9.99e-07	Down
GLUD1P8	-1.79945	5.06e-11	Down
LINC01645	-1.78384	1.95e-09	Down
KCNE5	-1.75287	0.000686	Down
GPR153	-1.72817	4.54e-15	Down
HGF	-1.69895	5.93e-05	Down
LTK	-1.69387	1.26e-07	Down
PALM	-1.67259	1.29e-10	Down
PRSS57	-1.65738	9.45e-06	Down
PLPPR3	-1.62577	3.75e-05	Down
COL23A1	-1.61638	1.27e-05	Down
ZNF711	-1.61431	9.82e-06	Down
AZU1	-1.60423	0.013	Down
MS4A3	-1.5934	0.00308	Down
PRTN3	-1.52924	0.0238	Down
FGFR1	-1.5249	9.89e-09	Down
AC002454.1	-1.51486	8.53e-06	Down
CST7	-1.49637	0.000308	Down
IRX1	-1.49019	8.91e-10	Down
AC005336.3	-1.48904	5.75e-06	Down
ITM2A	-1.48569	0.00105	Down
PTGDS	-1.47804	0.000498	Down
IGKV1-22	-1.47682	0.00172	Down
AC004381.1	-1.4688	3.4e-11	Down
CLU	-1.46046	0.000558	Down
IGKV2-23	-1.45513	0.00467	Down
TRH	-1.4396	0.0224	Down
MIR770	-1.43338	7.22e-08	Down
AL645608.6	-1.43089	1.35e-05	Down
CERCAM	-1.42995	1.02e-09	Down
DNM1	-1.4147	3.16e-07	Down
RN7SL646P	-1.39478	1.24e-06	Down
GLUD1P2	-1.37161	5.93e-10	Down
RNA5SP311	-1.36976	3.57e-07	Down
TRGV10	-1.36363	3.08e-05	Down
ASS1	-1.36327	1.09e-09	Down
AL049647.1	-1.36239	2.8e-08	Down
RTN4R	-1.35316	7.7e-09	Down
AFF2	-1.34544	1.19e-08	Down
DPY19L2	-1.34528	2.25e-06	Down
AC139491.2	-1.33652	6.26e-08	Down
LAMB2	-1.33358	0.000903	Down
BMS1P1	-1.3315	1.47e-08	Down
SLC28A3	-1.3256	2.47e-07	Down
UNCX	-1.32463	2.13e-08	Down
LINC02593	-1.31799	9.73e-07	Down
AL645608.2	-1.31497	1.82e-05	Down
EVPL	-1.31446	1.7e-06	Down
AC005336.2	-1.30877	1.53e-05	Down
CFD	-1.30855	0.0122	Down
GFI1	-1.30494	9.92e-06	Down
SERPING1	-1.30416	0.000432	Down
AGRN	-1.27902	8.28e-08	Down
RF02250	-1.27579	3.22e-13	Down
AEBP1	-1.26349	1.45e-06	Down
LINC01833	-1.26255	1.06e-11	Down
TPSAB1	-1.25815	0.0119	Down
AIF1L	-1.24937	0.000222	Down
MRC2	-1.23512	0.000151	Down
CALR	-1.2307	1.13e-11	Down
LOXL4	-1.21594	9.88e-09	Down
MLC1	-1.21446	4.28e-06	Down
AC136601.1	-1.20625	1.07e-06	Down
AK4	-1.20505	1.45e-11	Down
SNORD113-3	-1.20328	3.98e-09	Down
CERS4	-1.20265	6.98e-06	Down
GRASP	-1.20199	0.00021	Down
NPW	-1.20087	2.46e-05	Down
AC098934.1	-1.19937	3.14e-09	Down
SCN9A	-1.19233	8.48e-05	Down
COCH	-1.18276	2.79e-08	Down
CLEC11A	-1.18227	0.0419	Down
AIG1	-1.1797	4.65e-08	Down
IRX3	-1.17752	0.00245	Down
SLPI	-1.17362	0.00861	Down
DOC2B	-1.17351	6.62e-09	Down
AGAP13P	-1.17326	3.5e-06	Down
MFAP4	-1.17126	0.00193	Down
S100B	-1.17051	0.00407	Down
PLXNB1	-1.16547	2.06e-07	Down
AC087623.1	-1.16203	1.47e-08	Down
MDFI	-1.16135	0.000373	Down
GRTP1-AS1	-1.16116	1.66e-19	Down
ATP7B	-1.15676	1.68e-06	Down
AC055748.1	-1.15648	0.00933	Down
VEGFA	-1.15488	1.51e-09	Down
SNX18P7	-1.15065	0.000211	Down
RPS2P52	-1.14828	3.12e-05	Down
AC136601.2	-1.14719	7.01e-07	Down
AC008659.1	-1.14201	5.42e-06	Down
AGAP9	-1.13168	1.01e-06	Down
CD96	-1.13008	0.024	Down
RNU2-5P	-1.12872	2.8e-05	Down
RUNX1T1	-1.12509	9.56e-07	Down
CEBPE	-1.12381	9.17e-05	Down
LIN7A	-1.11563	0.00142	Down
COL4A5	-1.11471	0.00538	Down
MAP1A	-1.1124	0.00103	Down
FNDC3B	-1.09631	9.14e-11	Down
AC099489.2	-1.09356	0.00171	Down
EPCAM	-1.09239	1.2e-05	Down
FSCN1	-1.0893	0.000199	Down
SMC5-AS1	-1.07954	2.4e-06	Down
LAMC1	-1.07905	0.00153	Down
SNORD114-7	-1.07521	2.86e-08	Down
FNDC10	-1.07389	2.04e-06	Down
BNIP3P11	-1.06846	2.27e-08	Down
SAMD11	-1.06792	4.7e-08	Down
MGST1	-1.06647	0.000621	Down
SNX18P3	-1.06214	0.000631	Down
CYP4F26P	-1.06036	0.000135	Down
ADRA2A	-1.05556	7.6e-07	Down
STAR	-1.05231	4.13e-07	Down
SNORD114-3	-1.05192	2.11e-07	Down
GPT2	-1.05055	3.56e-05	Down
TNFRSF4	-1.05045	0.000658	Down
AL136090.1	-1.05041	1.03e-07	Down
AQP3	-1.04876	4.11e-06	Down
PRAME	-1.04771	0.0374	Down
MIR100HG	-1.04656	6.91e-08	Down
EMID1	-1.04652	0.000866	Down
SPRY2	-1.0443	0.000211	Down
POU4F1	-1.04294	0.0147	Down
TDRD9	-1.04052	0.00052	Down
IRX5	-1.04027	2.38e-06	Down
DSC2	-1.03848	4e-05	Down
KRT17	-1.03522	9.4e-06	Down
STON2	-1.03484	0.00659	Down
ZNF107	-1.02734	3.02e-08	Down
SLC25A29	-1.02506	1.22e-06	Down
CFH	-1.0192	0.000117	Down
IGF1R	-1.01675	0.000118	Down
TENT5C	-1.01564	0.000101	Down
NUDT10	-1.01532	1.02e-05	Down
PCBP3	-1.0089	2.27e-05	Down
WT1	-1.00406	4.86e-05	Down
LHFPL6	-1.00001	5.23e-06	Down
